# Supplementary material for: Increased BMPR1A Expression Enhances the Adipogenic Differentiation of Mesenchymal Stem Cells in Patients with Ankylosing Spondylitis
Source: PubMed Central journal article supplement (PMC6885782; doi:10.1155/2019/4143167), 2019-11-18
Supplement: 4143167.f1.pdf [file 4143167.f1.pdf]

**Supplemental Figure 1. HDMSCs and ASMSCs had comparable  $\beta$ -catenin expression in both the cytoplasm and nucleus during adipogenesis**

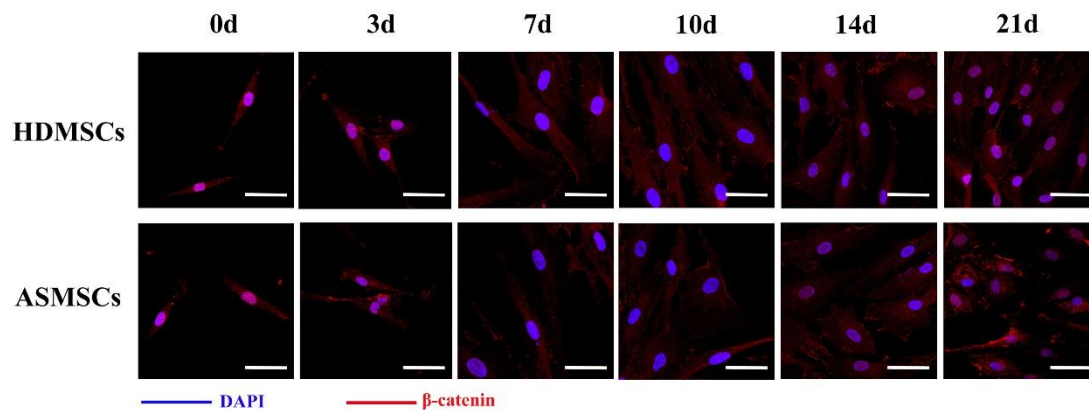

Expression of  $\beta$ -catenin in both the cytoplasm and nucleus during adipogenesis were determined by immunofluorescence assay (200 $\times$ , the white bars indicate 50  $\mu$ m). Nucleus was stained with DAPI (blue), whereas the expression of  $\beta$ -catenin (red) in both the cytoplasm and nucleus were detected by anti- $\beta$ -catenin. HDMSCs (n = 6) and ASMSCs (n = 6) had comparable  $\beta$ -catenin expression in both the cytoplasm and nucleus during adipogenesis.

**Supplemental Table 1. Characteristics of the study subjects who donated bone marrow**

|                                  | samples         |                  |
|----------------------------------|-----------------|------------------|
|                                  | Healthy donors  | Patients with AS |
| <b>Number</b>                    | 30              | 25               |
| <b>Age (years)</b>               | 30.5 $\pm$ 10.2 | 32.3 $\pm$ 13.1  |
| <b>Males, No. (%)</b>            | 19 (63.3%)      | 17 (68.0%)       |
| <b>HLA-B27-positive, No. (%)</b> | 0               | 23 (92.0%)*      |
| <b>Disease duration (years)</b>  | NA              | 6.94 $\pm$ 6.3   |
| <b>CRP (mg/L)</b>                | 3.5 $\pm$ 1.4   | 18.8 $\pm$ 13.3* |
| <b>ESR (mm/h)</b>                | 10.5 $\pm$ 3.6  | 28.2 $\pm$ 14.8* |
| <b>BASDAI</b>                    | 0.92 $\pm$ 0.88 | 4.72 $\pm$ 1.03* |

Means  $\pm$  SDs. AS, ankylosing spondylitis; HLA-B27, human leukocyte antigen B27; CRP,

C-reactive protein; ESR, erythrocyte sedimentation rate; BASDAI, Bath ankylosing

spondylitis disease activity index; \*  $P < 0.05$  compared to healthy donors.

**Supplemental Table 2. Primers used for qRT-PCR**

| Gene                            | Accession No. | Forward primer<br>(5'-3') | Reverse primer<br>(5'-3') | Product<br>size (bp) |
|---------------------------------|---------------|---------------------------|---------------------------|----------------------|
| <b>GAPDH</b>                    | NM_001256799  | GGAGCGAGATCCCTCCAAAAT     | GGCTGTTGTCATACTTCTCATGG   | 197                  |
| <b>PPAR-<math>\gamma</math></b> | NM_138711     | GGGATCAGCTCCGTGGATCT      | TGCACTTTGGTACTCTTGAAGTT   | 186                  |
| <b>FABP4</b>                    | NM_001442     | ACTGGGCCAGGAATTTGACG      | CTCGTGGAAGTGACGCCTT       | 183                  |
| <b>Adiponectin</b>              | NM_001177800  | AACATGCCCATTCGCTTTACC     | TAGGCAAAGTAGTACAGCCCA     | 107                  |
| <b>BMPR1A</b>                   | NM_004329     | AGATGACCAGGGAGAAACCAC     | CAACATTCTATTGTCCGGCGTA    | 111                  |
| <b>BMPR1B</b>                   | NM_001256792  | CTTTTGC GAAGTGCAGGAAAAT   | TGTTGACTGAGTCTTCTGGACAA   | 130                  |
| <b>BMPR2</b>                    | NM_001204     | CACTCAGTCCACCTCATT CATT   | TTGTTTACGGTCTCCTGTCAAC    | 131                  |
| <b>BMP2</b>                     | NM_001200     | GCCAAACACAAACAGCGGAA      | GGGAGCCACAATCCAGTCAT      | 102                  |
| <b>BMP4</b>                     | NM_001202     | ATGATTCTGGTAACCGAATGC     | CCCCGTCTCAGGTATCAA ACT    | 93                   |
| <b>BMP6</b>                     | NM_001718     | TGTTGGACACCCGTGTAGTAT     | AACCCACAGATTGCTAGTGGC     | 80                   |
| <b>BMP7</b>                     | NM_001719     | GGAACGCTTCGACAATGAGAC     | GCAGGAAGAGATCCGATTCCC     | 86                   |
| <b>BMP9</b>                     | NM_016204.2   | GCTTCAGCATGGAAGATGCC      | CCACGCTTCCTTTCAGGTCA      | 180                  |

**GAPDH**, glyceraldehyde-3-phosphate dehydrogenase; **PPAR- $\gamma$** , peroxisome proliferator-

activated receptor gamma; **FABP4**, fatty acid binding protein 4; **BMPR**, bone morphogenetic

protein receptor; **BMP**, bone morphogenetic protein.

**Supplemental Table 3. Characteristics of the study subjects who donated bone marrow tissues**

|                                  | <b>Healthy donors</b> | <b>Patients with AS</b> |
|----------------------------------|-----------------------|-------------------------|
| <b>Number</b>                    | 11                    | 10                      |
| <b>Age (years)</b>               | 28.9 ± 11.0           | 29.7 ± 12.5             |
| <b>Males, No. (%)</b>            | 8 (72.7%)             | 8 (80.0%)               |
| <b>HLA-B27-positive, No. (%)</b> | 0                     | 9 (90.0%)*              |
| <b>Disease duration (years)</b>  | NA                    | 4.84 ± 3.2              |
| <b>CRP (mg/L)</b>                | 3.3 ± 1.5             | 18.4 ± 11.2*            |
| <b>ESR (mm/h)</b>                | 12.8 ± 4.2            | 31.2 ± 15.1*            |
| <b>BASDAI</b>                    | 0.95 ± 0.87           | 4.67±1.02*              |

Means ± SDs. AS, ankylosing spondylitis; HLA-B27, human leukocyte antigen B27; CRP, C-reactive protein; ESR, erythrocyte sedimentation rate; BASDAI, Bath ankylosing spondylitis disease activity index; \* P < 0.05 compared to healthy donors.
